# Supplementary material
Source: HighWire-hosted journal article supplement (https://www.cancerbiomed.org/content/j.issn.2095-3941.2023.0301)
Supplement: media-1 [file media-1.pdf]

## Supplementary materials

**Table S1** Relationship between clinical characteristics and efficacy

| Characteristic             | Group          | <i>n</i> | ORR, <i>n</i> (%) | DCR, <i>n</i> (%) | mPFS  | mOS   | mDOR  |
|----------------------------|----------------|----------|-------------------|-------------------|-------|-------|-------|
| Location                   | Left-side      | 16       | 5 (31.25)         | 13 (81.25)        | 2.79  | 11.28 | 2.83  |
|                            | Right-side     | 5        | 1 (20.00)         | 5 (100.00)        | 5.78  | 14.75 | 2.92  |
|                            | <i>P</i> value |          | 0.999             | 0.549             | 0.158 | 0.923 | 0.953 |
| Treatment lines            | 3L             | 12       | 1 (8.33)          | 10 (83.33)        | 4.14  | 12.35 | 2.92  |
|                            | ≥ 4L           | 9        | 5 (55.56)         | 8 (88.89)         | 4.11  | 17.12 | 2.83  |
|                            | <i>P</i> value |          | 0.046             | 0.999             | 0.899 | 0.027 | 0.953 |
| Lung metastases            | Yes            | 13       | 2 (15.38)         | 10 (76.92)        | 4.11  | 11.86 | 11.14 |
|                            | No             | 8        | 4 (50.00)         | 8 (100.00)        | 4.14  | 15.10 | 2.81  |
|                            | <i>P</i> value |          | 0.146             | 0.257             | 0.941 | 0.688 | 0.049 |
| Liver metastases           | Yes            | 13       | 4 (30.77)         | 12 (92.31)        | 4.14  | 12.84 | 2.87  |
|                            | No             | 8        | 2 (25.00)         | 6 (75.00)         | 2.79  | 14.45 | 9.07  |
|                            | <i>P</i> value |          | 0.999             | 0.531             | 0.669 | 0.776 | 0.546 |
| Previous cetuximab therapy | Yes            | 7        | 1 (14.29)         | 6 (85.71)         | 4.11  | 11.86 | 2.79  |
|                            | No             | 14       | 5 (35.71)         | 12 (85.71)        | 4.14  | 13.80 | 2.92  |
|                            | <i>P</i> value |          | 0.613             | 0.999             | 0.206 | 0.160 | 0.247 |

*n*, number; ORR, objective response rate; DCR, disease control rate; mPFS, median progression-free survival; mOS, median overall survival; mDOR, median duration of response; NA, not available.

**Table S2** Summary of adverse events

| Group                              | TEAE <i>n</i> (%) | TRAE <i>n</i> (%) | irAE <i>n</i> (%) |
|------------------------------------|-------------------|-------------------|-------------------|
| All grade                          | 21 (100.0)        | 21 (100.0)        | 11 (52.4)         |
| Grade 1                            | 21 (100.0)        | 20 (95.2)         | 7 (33.3)          |
| Grade 2                            | 19 (90.5)         | 16 (76.2)         | 5 (23.8)          |
| ≥ Grade 3                          | 12 (57.1)         | 11 (52.4)         | 2 (9.5)           |
| Causing the suspension of SCT200   | 10 (47.6)         | 9 (42.9)          | 1 (4.8)           |
| Causing the suspension of SCT-I10A | 5 (23.8)          | 5 (23.8)          | 4 (19.0)          |
| Causing the withdrawal of SCT200   | 1 (4.8)           | 1 (4.8)           | 0                 |
| Causing the withdrawal of SCT-I10A | 1 (4.8)           | 1 (4.8)           | 0                 |

*n*, number; TRAE, treatment-related adverse event.

**Table S3** Baseline characteristics in SCT200 plus SCT-I10A cohort and SCT200 monotherapy cohort

|                                                | SCT200 plus SCT-I10A cohort<br>( <i>n</i> = 21) | SCT200 monotherapy cohort<br>( <i>n</i> = 25) |
|------------------------------------------------|-------------------------------------------------|-----------------------------------------------|
| Age, <i>n</i> (%)                              |                                                 |                                               |
| < 65                                           | 14 (66.7)                                       | 24 (96.0)                                     |
| ≥ 65                                           | 7 (33.3)                                        | 1 (4.0)                                       |
| Gender, <i>n</i> (%)                           |                                                 |                                               |
| Male                                           | 11 (52.4)                                       | 17 (68.0)                                     |
| Female                                         | 10 (47.6)                                       | 8 (32.0)                                      |
| ECOG, <i>n</i> (%)                             |                                                 |                                               |
| 0                                              | 6 (28.6)                                        | 0                                             |
| 1                                              | 15 (71.4)                                       | 25 (100.0)                                    |
| Location of the primary tumor, <i>n</i> (%)    |                                                 |                                               |
| Left-side colon or rectum                      | 16 (76.2)                                       | NA                                            |
| Right-side colon                               | 5 (23.8)                                        | NA                                            |
| Number of organs with metastases, <i>n</i> (%) |                                                 |                                               |
| 0                                              | 0                                               | NA                                            |
| 1                                              | 7 (33.3)                                        | NA                                            |
| 2                                              | 8 (38.1)                                        | NA                                            |
| ≥3                                             | 6 (28.6)                                        | NA                                            |
| Previous cetuximab therapy, <i>n</i> (%)       |                                                 |                                               |
| Yes                                            | 7 (33.3)                                        | 0                                             |
| No                                             | 14 (66.7)                                       | 25 (100.0)                                    |

*n*, number; ECOG PS, Eastern Cooperative Oncology Group performance status; NA, not available.

**Table S4** Summary of TRAEs occurring in  $\geq 20\%$  of patients or all TRAEs of grade 3 or 4 in SCT200 plus SCT-I10A cohort and SCT200 monotherapy cohort

| Adverse event                        | SCT200 plus SCT-I10A cohort <i>n</i> (%) |                | SCT200 monotherapy cohort <i>n</i> (%) |                |
|--------------------------------------|------------------------------------------|----------------|----------------------------------------|----------------|
|                                      | Any grade                                | $\geq$ Grade 3 | Any grade                              | $\geq$ Grade 3 |
| All                                  | 21 (100.0)                               | 12 (57.1)      | 25 (100.0)                             | 9 (36.0)       |
| Hypomagnesemia                       | 16 (76.2)                                | 7 (33.3)       | 22 (88.0)                              | 3 (12.0)       |
| Acneiform dermatitis                 | 9 (42.9)                                 | 2 (9.5)        | 24 (96.0)                              | 2 (8.0)        |
| Rash                                 | 10 (47.6)                                | 2 (9.5)        | 0                                      | 0              |
| Proteinuria                          | 8 (38.1)                                 | 0              | 0                                      | 0              |
| Hypoalbuminemia                      | 1 (4.8)                                  | 0              | 0                                      | 0              |
| Increased blood alkaline phosphatase | 4 (19.0)                                 | 0              | 1 (4.0)                                | 0              |
| Hypercholesterolemia                 | 0                                        | 0              | 3 (12.0)                               | 0              |
| Hyponatremia                         | 0                                        | 0              | 0                                      | 0              |
| Anemia                               | 0                                        | 0              | 0                                      | 0              |
| Increased alanine aminotransferase   | 2 (9.5)                                  | 0              | 9 (36.0)                               | 0              |
| Hypokalemia                          | 1 (4.8)                                  | 1 (4.8)        | 0                                      | 0              |
| Increased aspartate transferase      | 2 (9.5)                                  | 0              | 6 (24.0)                               | 0              |
| hypocalcemia                         | 1 (4.8)                                  | 0              | 5 (20.0)                               | 0              |
| Paronychia                           | 3 (14.3)                                 | 0              | 9 (36.0)                               | 0              |
| Chapped Skin                         | 1 (4.8)                                  | 0              | 3 (12.0)                               | 1 (4.0)        |
| Hypertriglyceridemia                 | 0                                        | 0              | 7 (28.0)                               | 0              |
| Leukopenia                           | 1 (4.8)                                  | 0              | 5 (20.0)                               | 0              |
| Dry skin                             | 1 (4.8)                                  | 0              | 4 (16.0)                               | 1 (4.0)        |
| Conjunctivitis                       | 1 (4.8)                                  | 0              | 7 (28.0)                               | 0              |
| Hypophosphatemia                     | 1 (4.8)                                  | 0              | 8 (32.0)                               | 0              |

*n*, number.
